# Supplementary material for: Investigation of Initial Viral Loads and Patient Characteristics as Predictors of COVID-19 Outcomes: A Retrospective Cohort Study
Source: MDPI journal article supplement (doi:10.3390/idr15050057), 2023-10-08
Supplement: s1 [file s1]

Supplementary Table S1: Patients and variables included in the study

| PATIENT<br>NUMBER | AGE (YEARS) | AGE GROUP<br>(1) > 60<br>(2) <=60 | SEX<br>(1) MALE<br>(2) FEMALE | CT VALUES AT<br>INITIAL<br>DIAGNOSIS | CT VALUES<br>CATEGORY<br>(1) HIGH VIRAL<br>LOAD (<=20)<br>(2) LOW VIRAL<br>LOAD (>20) | VACCINATION<br>(1) NONE<br>(2) YES | COMORBID<br>(1) YES<br>(2) NONE | CLINICAL<br>SYMPTOM<br>CATEGORY<br>(0) ASYMPTOMATIC<br>(1) MILD<br>(2) MODERATE<br>(3) SEVERE<br>(4) CRITICAL | SEVERITY<br>(0) NON SEVERE/CRITICAL<br>(1) SEVERE/CRITICAL | LENGTH OF<br>TREATMENT<br>(0) ≤ 14 DAYS<br>(1) > 14 DAYS | ICU ADMISSION<br>(0) NO<br>(1) YES | INVASIVE<br>VENTILATION<br>(0) NO<br>(1) YES | MORTALITY<br>(0) SURVIVE<br>(1) DEAD |
|-------------------|-------------|-----------------------------------|-------------------------------|--------------------------------------|---------------------------------------------------------------------------------------|------------------------------------|---------------------------------|---------------------------------------------------------------------------------------------------------------|------------------------------------------------------------|----------------------------------------------------------|------------------------------------|----------------------------------------------|--------------------------------------|
| 1                 | 22          | 2                                 | 2                             | 14.19                                | 1                                                                                     | 2                                  | 2                               | 1                                                                                                             | 0                                                          | 1                                                        | 0                                  | 0                                            | 0                                    |
| 2                 | 68          | 1                                 | 2                             | 32.19                                | 2                                                                                     | 1                                  | 2                               | 3                                                                                                             | 1                                                          | 0                                                        | 1                                  | 0                                            | 1                                    |
| 3                 | 26          | 2                                 | 2                             | 30.14                                | 2                                                                                     | 1                                  | 2                               | 3                                                                                                             | 1                                                          | 0                                                        | 1                                  | 0                                            | 0                                    |
| 4                 | 0           | 2                                 | 2                             | 34.93                                | 2                                                                                     | 2                                  | 1                               | 1                                                                                                             | 0                                                          | 0                                                        | 0                                  | 0                                            | 0                                    |
| 5                 | 66          | 1                                 | 2                             | 21.84                                | 2                                                                                     | 1                                  | 1                               | 3                                                                                                             | 1                                                          | 0                                                        | 1                                  | 0                                            | 1                                    |
| 6                 | 27          | 2                                 | 2                             | 12.74                                | 1                                                                                     | 1                                  | 2                               | 1                                                                                                             | 0                                                          | 0                                                        | 0                                  | 0                                            | 0                                    |
| 7                 | 60          | 2                                 | 1                             | 15.54                                | 1                                                                                     | 1                                  | 2                               | 0                                                                                                             | 0                                                          | 0                                                        | 0                                  | 0                                            | 0                                    |
| 8                 | 56          | 2                                 | 2                             | 25.61                                | 2                                                                                     | 1                                  | 1                               | 3                                                                                                             | 1                                                          | 0                                                        | 1                                  | 0                                            | 0                                    |
| 9                 | 29          | 2                                 | 1                             | 23.10                                | 2                                                                                     | 1                                  | 1                               | 1                                                                                                             | 0                                                          | 0                                                        | 0                                  | 0                                            | 0                                    |
| 10                | 62          | 1                                 | 1                             | 29.79                                | 2                                                                                     | 1                                  | 1                               | 3                                                                                                             | 1                                                          | 0                                                        | 1                                  | 0                                            | 0                                    |
| 11                | 58          | 2                                 | 1                             | 21.18                                | 2                                                                                     | 1                                  | 1                               | 2                                                                                                             | 0                                                          | 1                                                        | 0                                  | 0                                            | 0                                    |
| 12                | 52          | 2                                 | 2                             | 32.20                                | 2                                                                                     | 1                                  | 1                               | 2                                                                                                             | 0                                                          | 1                                                        | 0                                  | 0                                            | 0                                    |
| 13                | 18          | 2                                 | 1                             | 26.99                                | 2                                                                                     | 1                                  | 1                               | 3                                                                                                             | 1                                                          | 1                                                        | 1                                  | 0                                            | 0                                    |
| 14                | 23          | 2                                 | 1                             | 27.52                                | 2                                                                                     | 1                                  | 2                               | 0                                                                                                             | 0                                                          | 1                                                        | 0                                  | 0                                            | 0                                    |
| 15                | 23          | 2                                 | 2                             | 22.42                                | 2                                                                                     | 1                                  | 2                               | 1                                                                                                             | 0                                                          | 0                                                        | 0                                  | 0                                            | 0                                    |
| 16                | 35          | 2                                 | 2                             | 16.40                                | 1                                                                                     | 2                                  | 1                               | 1                                                                                                             | 0                                                          | 0                                                        | 0                                  | 0                                            | 0                                    |
| 17                | 27          | 2                                 | 2                             | 32.46                                | 2                                                                                     | 1                                  | 1                               | 1                                                                                                             | 0                                                          | 0                                                        | 0                                  | 0                                            | 0                                    |
| 18                | 73          | 1                                 | 1                             | 33.76                                | 2                                                                                     | 1                                  | 1                               | 2                                                                                                             | 0                                                          | 0                                                        | 0                                  | 0                                            | 0                                    |
| 19                | 30          | 2                                 | 1                             | 11.62                                | 1                                                                                     | 1                                  | 1                               | 0                                                                                                             | 0                                                          | 0                                                        | 0                                  | 0                                            | 0                                    |
| 20                | 64          | 1                                 | 2                             | 28.39                                | 2                                                                                     | 1                                  | 1                               | 3                                                                                                             | 1                                                          | 1                                                        | 1                                  | 0                                            | 0                                    |
| 21                | 20          | 2                                 | 2                             | 32.23                                | 2                                                                                     | 2                                  | 2                               | 1                                                                                                             | 0                                                          | 0                                                        | 0                                  | 0                                            | 0                                    |
| 22                | 73          | 1                                 | 1                             | 21.79                                | 2                                                                                     | 1                                  | 1                               | 3                                                                                                             | 1                                                          | 0                                                        | 1                                  | 0                                            | 1                                    |
| 23                | 62          | 1                                 | 1                             | 26.44                                | 2                                                                                     | 1                                  | 1                               | 3                                                                                                             | 1                                                          | 1                                                        | 1                                  | 0                                            | 0                                    |
| 24                | 59          | 2                                 | 1                             | 25.90                                | 2                                                                                     | 1                                  | 2                               | 0                                                                                                             | 0                                                          | 0                                                        | 0                                  | 0                                            | 0                                    |
| 25                | 54          | 2                                 | 1                             | 32.58                                | 2                                                                                     | 1                                  | 1                               | 3                                                                                                             | 1                                                          | 0                                                        | 1                                  | 0                                            | 0                                    |
| 26                | 70          | 1                                 | 2                             | 15.10                                | 1                                                                                     | 1                                  | 1                               | 2                                                                                                             | 0                                                          | 0                                                        | 0                                  | 0                                            | 0                                    |
| 27                | 21          | 2                                 | 2                             | 15.53                                | 1                                                                                     | 2                                  | 2                               | 1                                                                                                             | 0                                                          | 0                                                        | 0                                  | 0                                            | 0                                    |
| 28                | 60          | 2                                 | 2                             | 21.40                                | 2                                                                                     | 1                                  | 1                               | 4                                                                                                             | 1                                                          | 0                                                        | 1                                  | 1                                            | 1                                    |
| 29                | 52          | 2                                 | 2                             | 27.82                                | 2                                                                                     | 2                                  | 1                               | 1                                                                                                             | 0                                                          | 0                                                        | 0                                  | 0                                            | 0                                    |
| 30                | 24          | 2                                 | 1                             | 32.42                                | 2                                                                                     | 1                                  | 2                               | 2                                                                                                             | 0                                                          | 0                                                        | 0                                  | 0                                            | 0                                    |
| 31                | 24          | 2                                 | 1                             | 19.37                                | 1                                                                                     | 2                                  | 1                               | 2                                                                                                             | 0                                                          | 0                                                        | 0                                  | 0                                            | 0                                    |
| 32                | 53          | 2                                 | 1                             | 26.10                                | 2                                                                                     | 1                                  | 1                               | 4                                                                                                             | 1                                                          | 0                                                        | 1                                  | 1                                            | 1                                    |
| 33                | 63          | 1                                 | 1                             | 21.36                                | 2                                                                                     | 1                                  | 1                               | 3                                                                                                             | 1                                                          | 0                                                        | 1                                  | 0                                            | 1                                    |
| 34                | 83          | 1                                 | 1                             | 21.10                                | 2                                                                                     | 1                                  | 1                               | 3                                                                                                             | 1                                                          | 0                                                        | 1                                  | 0                                            | 0                                    |
| 35                | 25          | 2                                 | 2                             | 32.51                                | 2                                                                                     | 1                                  | 1                               | 1                                                                                                             | 0                                                          | 0                                                        | 0                                  | 0                                            | 0                                    |
| 36                | 24          | 2                                 | 1                             | 25.39                                | 2                                                                                     | 1                                  | 2                               | 0                                                                                                             | 0                                                          | 1                                                        | 0                                  | 0                                            | 0                                    |
| 37                | 26          | 2                                 | 2                             | 31.24                                | 2                                                                                     | 1                                  | 1                               | 1                                                                                                             | 0                                                          | 0                                                        | 0                                  | 0                                            | 0                                    |
| 38                | 29          | 2                                 | 2                             | 17.14                                | 1                                                                                     | 1                                  | 2                               | 1                                                                                                             | 0                                                          | 0                                                        | 0                                  | 0                                            | 0                                    |
| 39                | 26          | 2                                 | 2                             | 30.06                                | 2                                                                                     | 1                                  | 1                               | 1                                                                                                             | 0                                                          | 0                                                        | 0                                  | 0                                            | 0                                    |
| 40                | 63          | 1                                 | 2                             | 17.96                                | 1                                                                                     | 1                                  | 1                               | 2                                                                                                             | 0                                                          | 0                                                        | 0                                  | 0                                            | 0                                    |
| 41                | 21          | 2                                 | 2                             | 13.87                                | 1                                                                                     | 1                                  | 2                               | 2                                                                                                             | 0                                                          | 1                                                        | 0                                  | 0                                            | 0                                    |
| 42                | 27          | 2                                 | 1                             | 32.11                                | 2                                                                                     | 1                                  | 1                               | 2                                                                                                             | 0                                                          | 0                                                        | 0                                  | 0                                            | 0                                    |
| 43                | 22          | 2                                 | 2                             | 22.98                                | 2                                                                                     | 1                                  | 2                               | 1                                                                                                             | 0                                                          | 1                                                        | 0                                  | 0                                            | 0                                    |
| 44                | 27          | 2                                 | 1                             | 20.80                                | 2                                                                                     | 1                                  | 2                               | 1                                                                                                             | 0                                                          | 1                                                        | 0                                  | 0                                            | 0                                    |
| 45                | 52          | 2                                 | 2                             | 26.37                                | 2                                                                                     | 1                                  | 1                               | 2                                                                                                             | 0                                                          | 0                                                        | 0                                  | 0                                            | 0                                    |
| 46                | 32          | 2                                 | 2                             | 22.43                                | 2                                                                                     | 1                                  | 1                               | 1                                                                                                             | 0                                                          | 0                                                        | 0                                  | 0                                            | 0                                    |
| 47                | 71          | 1                                 | 2                             | 24.65                                | 2                                                                                     | 2                                  | 1                               | 2                                                                                                             | 0                                                          | 0                                                        | 0                                  | 0                                            | 0                                    |
| 48                | 43          | 2                                 | 2                             | 19.06                                | 1                                                                                     | 2                                  | 1                               | 1                                                                                                             | 0                                                          | 1                                                        | 0                                  | 0                                            | 0                                    |
| 49                | 20          | 2                                 | 1                             | 19.48                                | 1                                                                                     | 2                                  | 2                               | 1                                                                                                             | 0                                                          | 0                                                        | 0                                  | 0                                            | 0                                    |

|     |    |   |   |       |   |   |   |   |   |   |   |   |   |
|-----|----|---|---|-------|---|---|---|---|---|---|---|---|---|
| 50  | 45 | 2 | 2 | 28.49 | 2 | 1 | 1 | 1 | 0 | 0 | 0 | 0 | 0 |
| 51  | 24 | 2 | 2 | 15.08 | 1 | 1 | 1 | 1 | 0 | 0 | 0 | 0 | 0 |
| 52  | 37 | 2 | 2 | 18.63 | 1 | 1 | 2 | 3 | 1 | 0 | 1 | 0 | 0 |
| 53  | 38 | 2 | 1 | 33.63 | 2 | 1 | 1 | 3 | 1 | 0 | 1 | 0 | 0 |
| 54  | 28 | 2 | 2 | 31.09 | 2 | 1 | 1 | 1 | 0 | 0 | 0 | 0 | 0 |
| 55  | 53 | 2 | 2 | 15.46 | 1 | 1 | 2 | 3 | 1 | 1 | 1 | 0 | 0 |
| 56  | 27 | 2 | 2 | 28.21 | 2 | 1 | 1 | 1 | 0 | 0 | 0 | 0 | 0 |
| 57  | 27 | 2 | 2 | 17.34 | 1 | 1 | 2 | 2 | 0 | 1 | 0 | 0 | 0 |
| 58  | 54 | 2 | 2 | 20.03 | 2 | 2 | 1 | 2 | 0 | 0 | 0 | 0 | 0 |
| 59  | 88 | 1 | 1 | 22.03 | 2 | 1 | 1 | 3 | 1 | 0 | 1 | 0 | 0 |
| 60  | 25 | 2 | 2 | 22.50 | 2 | 1 | 2 | 0 | 0 | 0 | 0 | 0 | 0 |
| 61  | 24 | 2 | 2 | 29.15 | 2 | 1 | 2 | 1 | 0 | 0 | 0 | 0 | 0 |
| 62  | 69 | 1 | 1 | 31.32 | 2 | 1 | 1 | 3 | 1 | 0 | 1 | 0 | 1 |
| 63  | 33 | 2 | 2 | 16.03 | 1 | 2 | 2 | 1 | 0 | 0 | 0 | 0 | 0 |
| 64  | 62 | 1 | 1 | 22.53 | 2 | 1 | 1 | 3 | 1 | 1 | 1 | 0 | 0 |
| 65  | 51 | 2 | 1 | 33.57 | 2 | 2 | 1 | 2 | 0 | 0 | 0 | 0 | 0 |
| 66  | 19 | 2 | 1 | 20.31 | 2 | 1 | 1 | 1 | 0 | 0 | 0 | 0 | 0 |
| 67  | 22 | 2 | 2 | 16.55 | 1 | 1 | 2 | 1 | 0 | 0 | 0 | 0 | 0 |
| 68  | 29 | 2 | 2 | 31.5  | 2 | 1 | 1 | 1 | 0 | 0 | 0 | 0 | 0 |
| 69  | 60 | 2 | 1 | 21.4  | 2 | 1 | 1 | 2 | 0 | 1 | 0 | 0 | 0 |
| 70  | 77 | 1 | 1 | 19.80 | 1 | 1 | 2 | 3 | 1 | 0 | 1 | 0 | 1 |
| 71  | 27 | 2 | 1 | 23.50 | 2 | 1 | 1 | 1 | 0 | 0 | 0 | 0 | 0 |
| 72  | 26 | 2 | 1 | 24.90 | 2 | 1 | 2 | 1 | 0 | 0 | 0 | 0 | 0 |
| 73  | 61 | 1 | 2 | 23.40 | 2 | 1 | 1 | 1 | 0 | 1 | 0 | 0 | 0 |
| 74  | 36 | 2 | 1 | 27.58 | 2 | 1 | 2 | 0 | 0 | 0 | 0 | 0 | 0 |
| 75  | 62 | 1 | 2 | 29.15 | 2 | 2 | 1 | 2 | 0 | 0 | 0 | 0 | 0 |
| 76  | 71 | 1 | 2 | 27.61 | 2 | 1 | 1 | 2 | 0 | 1 | 0 | 0 | 0 |
| 77  | 57 | 2 | 1 | 28.96 | 2 | 1 | 2 | 0 | 0 | 0 | 0 | 0 | 0 |
| 78  | 26 | 2 | 2 | 17.53 | 1 | 2 | 2 | 0 | 0 | 0 | 0 | 0 | 0 |
| 79  | 28 | 2 | 2 | 20.67 | 2 | 1 | 2 | 0 | 0 | 0 | 0 | 0 | 0 |
| 80  | 44 | 2 | 2 | 29.75 | 2 | 1 | 2 | 0 | 0 | 1 | 0 | 0 | 0 |
| 81  | 29 | 2 | 2 | 23.64 | 2 | 1 | 1 | 3 | 1 | 0 | 1 | 0 | 0 |
| 82  | 17 | 2 | 2 | 21.17 | 2 | 2 | 2 | 1 | 0 | 0 | 0 | 0 | 0 |
| 83  | 77 | 1 | 1 | 20.60 | 2 | 1 | 2 | 2 | 0 | 0 | 0 | 0 | 0 |
| 84  | 56 | 2 | 1 | 21.51 | 2 | 1 | 2 | 2 | 0 | 0 | 0 | 0 | 0 |
| 85  | 9  | 2 | 2 | 17.07 | 1 | 1 | 2 | 0 | 0 | 0 | 0 | 0 | 0 |
| 86  | 31 | 2 | 2 | 34.19 | 2 | 1 | 2 | 0 | 0 | 0 | 0 | 0 | 0 |
| 87  | 68 | 1 | 1 | 10.75 | 1 | 1 | 2 | 3 | 1 | 0 | 1 | 0 | 0 |
| 88  | 48 | 2 | 1 | 28.3  | 2 | 1 | 1 | 3 | 1 | 1 | 1 | 0 | 0 |
| 89  | 51 | 2 | 2 | 28.49 | 2 | 1 | 1 | 3 | 1 | 0 | 1 | 0 | 0 |
| 90  | 27 | 2 | 2 | 27.39 | 2 | 2 | 2 | 2 | 0 | 0 | 0 | 0 | 0 |
| 91  | 60 | 2 | 1 | 20.93 | 2 | 1 | 1 | 3 | 1 | 0 | 1 | 0 | 0 |
| 92  | 61 | 1 | 2 | 17.11 | 1 | 2 | 1 | 2 | 0 | 1 | 0 | 0 | 0 |
| 93  | 28 | 2 | 2 | 29.02 | 2 | 1 | 2 | 1 | 0 | 0 | 0 | 0 | 0 |
| 94  | 33 | 2 | 2 | 29.02 | 2 | 1 | 2 | 0 | 0 | 0 | 0 | 0 | 0 |
| 95  | 27 | 2 | 2 | 29.06 | 2 | 1 | 2 | 0 | 0 | 0 | 0 | 0 | 0 |
| 96  | 56 | 2 | 2 | 18.70 | 1 | 1 | 2 | 1 | 0 | 0 | 0 | 0 | 0 |
| 97  | 72 | 1 | 2 | 22.46 | 2 | 1 | 2 | 1 | 0 | 0 | 0 | 0 | 0 |
| 98  | 53 | 2 | 2 | 27.15 | 2 | 1 | 2 | 3 | 1 | 0 | 1 | 0 | 1 |
| 99  | 56 | 2 | 2 | 14.15 | 1 | 1 | 1 | 2 | 0 | 0 | 0 | 0 | 0 |
| 100 | 41 | 2 | 2 | 23.68 | 2 | 1 | 1 | 1 | 0 | 0 | 0 | 0 | 0 |
| 101 | 49 | 2 | 2 | 30.35 | 2 | 1 | 1 | 1 | 0 | 0 | 0 | 0 | 0 |
| 102 | 61 | 1 | 1 | 17.54 | 1 | 1 | 1 | 1 | 0 | 0 | 0 | 0 | 0 |
| 103 | 61 | 1 | 2 | 11.61 | 1 | 1 | 2 | 3 | 1 | 0 | 1 | 0 | 0 |
| 104 | 57 | 2 | 2 | 22.25 | 2 | 1 | 2 | 2 | 0 | 0 | 0 | 0 | 0 |
| 105 | 56 | 2 | 2 | 18.28 | 1 | 1 | 1 | 2 | 0 | 0 | 0 | 0 | 0 |
| 106 | 44 | 2 | 2 | 28.83 | 2 | 1 | 1 | 2 | 0 | 0 | 0 | 0 | 0 |
| 107 | 36 | 2 | 2 | 30.40 | 2 | 1 | 1 | 1 | 0 | 1 | 0 | 0 | 0 |
| 108 | 70 | 1 | 2 | 26.45 | 2 | 1 | 1 | 2 | 0 | 0 | 0 | 0 | 0 |

|     |    |   |   |       |   |   |   |   |   |   |   |   |   |
|-----|----|---|---|-------|---|---|---|---|---|---|---|---|---|
| 109 | 63 | 1 | 1 | 23.64 | 2 | 1 | 1 | 4 | 1 | 1 | 1 | 1 | 1 |
| 110 | 22 | 2 | 2 | 26.09 | 2 | 1 | 2 | 1 | 0 | 0 | 0 | 0 | 0 |
| 111 | 3  | 2 | 2 | 28.55 | 2 | 1 | 2 | 2 | 0 | 1 | 0 | 0 | 0 |
| 112 | 25 | 2 | 2 | 20.13 | 2 | 1 | 2 | 0 | 0 | 0 | 0 | 0 | 0 |
| 113 | 10 | 2 | 2 | 17.02 | 1 | 1 | 2 | 0 | 0 | 0 | 0 | 0 | 0 |
| 114 | 55 | 2 | 2 | 30.21 | 2 | 1 | 1 | 3 | 1 | 0 | 1 | 0 | 1 |
| 115 | 24 | 2 | 2 | 15.17 | 1 | 1 | 2 | 1 | 0 | 0 | 0 | 0 | 0 |
| 116 | 35 | 2 | 2 | 15.19 | 1 | 1 | 2 | 1 | 0 | 0 | 0 | 0 | 0 |
| 117 | 63 | 1 | 1 | 18.15 | 1 | 1 | 1 | 3 | 1 | 0 | 1 | 0 | 1 |
| 118 | 29 | 2 | 1 | 28.05 | 2 | 1 | 1 | 3 | 1 | 1 | 1 | 0 | 0 |
| 119 | 56 | 2 | 1 | 29.87 | 2 | 1 | 2 | 4 | 1 | 0 | 1 | 1 | 0 |
| 120 | 59 | 2 | 2 | 25.12 | 2 | 1 | 2 | 0 | 0 | 1 | 0 | 0 | 0 |
| 121 | 62 | 1 | 1 | 20.69 | 2 | 1 | 1 | 2 | 0 | 0 | 0 | 0 | 0 |
| 122 | 35 | 2 | 1 | 22.02 | 2 | 1 | 1 | 3 | 1 | 0 | 1 | 0 | 1 |
| 123 | 62 | 1 | 2 | 12.71 | 1 | 1 | 1 | 2 | 0 | 0 | 0 | 0 | 0 |
| 124 | 65 | 1 | 1 | 23.10 | 2 | 1 | 2 | 0 | 0 | 0 | 0 | 0 | 0 |
| 125 | 44 | 2 | 1 | 23.10 | 2 | 1 | 1 | 2 | 0 | 0 | 0 | 0 | 0 |
| 126 | 53 | 2 | 1 | 17.02 | 1 | 2 | 1 | 2 | 0 | 0 | 0 | 0 | 0 |
| 127 | 66 | 1 | 1 | 12.54 | 1 | 1 | 2 | 3 | 1 | 0 | 1 | 0 | 0 |
| 128 | 36 | 2 | 2 | 36.26 | 2 | 2 | 2 | 2 | 0 | 1 | 0 | 0 | 0 |
| 129 | 38 | 2 | 1 | 25.43 | 2 | 1 | 1 | 2 | 0 | 1 | 0 | 0 | 0 |
| 130 | 46 | 2 | 1 | 20.70 | 2 | 1 | 1 | 2 | 0 | 0 | 0 | 0 | 0 |
| 131 | 21 | 2 | 2 | 27.46 | 2 | 1 | 2 | 1 | 0 | 0 | 0 | 0 | 0 |
| 132 | 39 | 2 | 1 | 17.94 | 1 | 1 | 1 | 2 | 0 | 0 | 0 | 0 | 0 |
| 133 | 24 | 2 | 1 | 21.86 | 2 | 1 | 2 | 1 | 0 | 0 | 0 | 0 | 0 |
| 134 | 37 | 2 | 2 | 16.31 | 1 | 1 | 2 | 0 | 0 | 0 | 0 | 0 | 0 |
| 135 | 59 | 2 | 2 | 32.05 | 2 | 2 | 2 | 1 | 0 | 0 | 0 | 0 | 0 |
| 136 | 67 | 1 | 1 | 25.26 | 2 | 1 | 2 | 2 | 0 | 1 | 0 | 0 | 0 |
| 137 | 38 | 2 | 2 | 23.12 | 2 | 2 | 1 | 2 | 0 | 0 | 0 | 0 | 0 |
| 138 | 52 | 2 | 2 | 14.63 | 1 | 1 | 1 | 2 | 0 | 0 | 0 | 0 | 0 |
| 139 | 52 | 2 | 1 | 17.47 | 1 | 1 | 1 | 3 | 1 | 0 | 1 | 0 | 0 |
| 140 | 79 | 1 | 1 | 21.69 | 2 | 1 | 2 | 2 | 0 | 0 | 0 | 0 | 0 |
| 141 | 28 | 2 | 1 | 17.20 | 1 | 1 | 2 | 0 | 0 | 0 | 0 | 0 | 0 |
| 142 | 50 | 2 | 2 | 16.41 | 1 | 1 | 1 | 2 | 0 | 1 | 0 | 0 | 0 |
| 143 | 25 | 2 | 1 | 20.76 | 2 | 1 | 2 | 1 | 0 | 0 | 0 | 0 | 0 |
| 144 | 59 | 2 | 1 | 24.73 | 2 | 1 | 1 | 2 | 0 | 0 | 0 | 0 | 0 |
| 145 | 24 | 2 | 2 | 13.29 | 1 | 1 | 2 | 1 | 0 | 0 | 0 | 0 | 0 |
| 146 | 53 | 2 | 2 | 20.18 | 2 | 1 | 2 | 1 | 0 | 0 | 0 | 0 | 0 |
| 147 | 76 | 1 | 1 | 29.64 | 2 | 1 | 2 | 3 | 1 | 0 | 1 | 0 | 0 |
| 148 | 21 | 2 | 2 | 15.78 | 1 | 1 | 1 | 1 | 0 | 0 | 0 | 0 | 0 |
| 149 | 27 | 2 | 2 | 33.88 | 2 | 1 | 2 | 1 | 0 | 0 | 0 | 0 | 0 |
| 150 | 21 | 2 | 2 | 24.36 | 2 | 1 | 2 | 0 | 0 | 0 | 0 | 0 | 0 |
| 151 | 39 | 2 | 2 | 35.12 | 2 | 1 | 1 | 1 | 0 | 0 | 0 | 0 | 0 |
| 152 | 37 | 2 | 2 | 13.58 | 1 | 1 | 2 | 0 | 0 | 0 | 0 | 0 | 0 |
| 153 | 21 | 2 | 2 | 16.09 | 1 | 1 | 1 | 1 | 0 | 0 | 0 | 0 | 0 |
| 154 | 30 | 2 | 2 | 15.44 | 1 | 2 | 2 | 2 | 0 | 0 | 0 | 0 | 0 |
| 155 | 27 | 2 | 2 | 28.11 | 2 | 2 | 2 | 1 | 0 | 0 | 0 | 0 | 0 |
| 156 | 59 | 2 | 1 | 31.93 | 2 | 1 | 1 | 2 | 0 | 1 | 0 | 0 | 0 |
| 157 | 66 | 1 | 2 | 16.61 | 1 | 1 | 1 | 3 | 1 | 0 | 1 | 0 | 0 |
| 158 | 45 | 2 | 2 | 18.87 | 1 | 1 | 1 | 3 | 1 | 0 | 1 | 0 | 1 |
| 159 | 65 | 1 | 1 | 26.52 | 2 | 1 | 2 | 0 | 0 | 1 | 0 | 0 | 0 |
| 160 | 33 | 2 | 2 | 26.09 | 2 | 1 | 2 | 3 | 1 | 0 | 1 | 0 | 0 |
| 161 | 37 | 2 | 2 | 26.94 | 2 | 1 | 2 | 3 | 1 | 0 | 1 | 0 | 0 |
| 162 | 49 | 2 | 2 | 33.12 | 2 | 1 | 2 | 4 | 1 | 0 | 1 | 1 | 1 |
| 163 | 54 | 2 | 2 | 30.11 | 2 | 1 | 2 | 4 | 1 | 0 | 1 | 1 | 1 |
| 164 | 48 | 2 | 1 | 19.19 | 1 | 1 | 1 | 3 | 1 | 0 | 1 | 0 | 1 |
| 165 | 58 | 2 | 2 | 19.71 | 1 | 1 | 2 | 1 | 0 | 0 | 0 | 0 | 0 |
| 166 | 69 | 1 | 1 | 24.78 | 2 | 1 | 2 | 0 | 0 | 0 | 0 | 0 | 0 |
| 167 | 66 | 1 | 2 | 33.00 | 2 | 1 | 1 | 3 | 1 | 0 | 1 | 0 | 1 |

|     |    |   |   |       |   |   |   |   |   |   |   |   |   |
|-----|----|---|---|-------|---|---|---|---|---|---|---|---|---|
| 168 | 68 | 1 | 1 | 16.99 | 1 | 1 | 1 | 1 | 0 | 0 | 0 | 0 | 0 |
| 169 | 21 | 2 | 2 | 18.47 | 1 | 1 | 2 | 1 | 0 | 0 | 0 | 0 | 0 |
| 170 | 26 | 2 | 2 | 21.37 | 2 | 1 | 2 | 0 | 0 | 1 | 0 | 0 | 0 |
| 171 | 53 | 2 | 2 | 32.37 | 2 | 1 | 2 | 0 | 0 | 0 | 0 | 0 | 0 |
| 172 | 29 | 2 | 2 | 25.96 | 2 | 1 | 2 | 0 | 0 | 0 | 0 | 0 | 0 |
| 173 | 61 | 1 | 2 | 27.54 | 2 | 1 | 1 | 3 | 1 | 0 | 1 | 0 | 1 |
| 174 | 67 | 1 | 1 | 12.14 | 1 | 1 | 1 | 3 | 1 | 0 | 1 | 0 | 1 |
| 175 | 69 | 1 | 1 | 21.82 | 2 | 1 | 2 | 0 | 0 | 0 | 0 | 0 | 0 |
| 176 | 30 | 2 | 1 | 17.53 | 1 | 1 | 2 | 2 | 0 | 1 | 0 | 0 | 0 |
| 177 | 22 | 2 | 2 | 12.98 | 1 | 1 | 2 | 1 | 0 | 1 | 0 | 0 | 0 |
| 178 | 71 | 1 | 2 | 22.23 | 2 | 1 | 1 | 3 | 1 | 0 | 1 | 0 | 0 |
| 179 | 61 | 1 | 2 | 26.46 | 2 | 1 | 2 | 0 | 0 | 0 | 0 | 0 | 0 |
| 180 | 61 | 1 | 2 | 24.44 | 2 | 1 | 1 | 3 | 1 | 0 | 0 | 0 | 0 |
| 181 | 57 | 2 | 2 | 18.07 | 1 | 1 | 2 | 3 | 1 | 1 | 1 | 0 | 0 |
| 182 | 26 | 2 | 2 | 17.43 | 1 | 1 | 2 | 1 | 0 | 0 | 0 | 0 | 0 |
| 183 | 57 | 2 | 1 | 16.54 | 1 | 1 | 1 | 3 | 1 | 0 | 1 | 0 | 0 |
| 184 | 63 | 1 | 2 | 29.62 | 2 | 1 | 2 | 0 | 0 | 0 | 0 | 0 | 0 |
| 185 | 26 | 2 | 2 | 15.82 | 1 | 1 | 2 | 2 | 0 | 0 | 0 | 0 | 0 |
| 186 | 37 | 2 | 1 | 29.25 | 2 | 2 | 1 | 2 | 0 | 0 | 0 | 0 | 0 |
| 187 | 26 | 2 | 1 | 12.21 | 1 | 2 | 2 | 1 | 0 | 0 | 0 | 0 | 0 |
| 188 | 8  | 2 | 2 | 34.02 | 2 | 1 | 2 | 0 | 0 | 0 | 0 | 0 | 0 |
| 189 | 71 | 1 | 2 | 21.32 | 2 | 1 | 2 | 2 | 0 | 0 | 0 | 0 | 0 |
| 190 | 34 | 2 | 2 | 33.02 | 2 | 1 | 2 | 1 | 0 | 0 | 0 | 0 | 0 |
| 191 | 58 | 2 | 1 | 30.40 | 2 | 1 | 1 | 1 | 0 | 0 | 0 | 0 | 0 |
| 192 | 28 | 2 | 2 | 28.65 | 2 | 1 | 1 | 1 | 0 | 0 | 0 | 0 | 0 |
| 193 | 23 | 2 | 2 | 24.47 | 2 | 1 | 2 | 1 | 0 | 0 | 0 | 0 | 0 |
| 194 | 54 | 2 | 1 | 26.72 | 2 | 1 | 2 | 0 | 0 | 0 | 0 | 0 | 0 |
| 195 | 1  | 2 | 2 | 25.14 | 2 | 1 | 2 | 2 | 0 | 0 | 0 | 0 | 0 |
| 196 | 24 | 2 | 2 | 18.20 | 1 | 1 | 2 | 1 | 0 | 0 | 0 | 0 | 0 |
| 197 | 24 | 2 | 2 | 15.92 | 1 | 1 | 2 | 0 | 0 | 0 | 0 | 0 | 0 |
| 198 | 91 | 1 | 2 | 29.53 | 2 | 1 | 2 | 3 | 1 | 1 | 1 | 0 | 0 |
| 199 | 25 | 2 | 2 | 16.7  | 1 | 1 | 2 | 0 | 0 | 0 | 0 | 0 | 0 |
| 200 | 29 | 2 | 1 | 15.21 | 1 | 1 | 2 | 1 | 0 | 0 | 0 | 0 | 0 |
| 201 | 25 | 2 | 2 | 24.02 | 2 | 2 | 2 | 1 | 0 | 0 | 0 | 0 | 0 |
| 202 | 58 | 2 | 1 | 28.34 | 2 | 1 | 1 | 4 | 1 | 0 | 1 | 1 | 0 |
| 203 | 16 | 2 | 2 | 30.50 | 2 | 1 | 2 | 0 | 0 | 0 | 0 | 0 | 0 |
| 204 | 61 | 1 | 1 | 16.88 | 1 | 1 | 2 | 0 | 0 | 1 | 0 | 0 | 0 |
| 205 | 28 | 2 | 2 | 13.30 | 1 | 2 | 2 | 1 | 0 | 0 | 0 | 0 | 0 |
| 206 | 32 | 2 | 2 | 23.21 | 2 | 1 | 2 | 1 | 0 | 0 | 0 | 0 | 0 |
| 207 | 32 | 2 | 2 | 29.44 | 2 | 1 | 2 | 0 | 0 | 0 | 0 | 0 | 0 |
| 208 | 55 | 2 | 1 | 17.49 | 1 | 1 | 2 | 3 | 1 | 0 | 0 | 0 | 0 |
| 209 | 72 | 1 | 2 | 27.16 | 2 | 1 | 1 | 4 | 1 | 0 | 1 | 1 | 1 |
| 210 | 65 | 1 | 2 | 19.04 | 1 | 1 | 1 | 3 | 1 | 0 | 1 | 0 | 1 |
| 211 | 72 | 1 | 2 | 15.05 | 1 | 1 | 1 | 0 | 0 | 0 | 0 | 0 | 0 |
| 212 | 38 | 2 | 1 | 29.58 | 2 | 1 | 2 | 0 | 0 | 0 | 0 | 0 | 0 |
| 213 | 62 | 1 | 2 | 18.55 | 1 | 1 | 2 | 3 | 1 | 0 | 1 | 0 | 0 |
| 214 | 45 | 2 | 2 | 27.50 | 2 | 1 | 2 | 2 | 0 | 0 | 0 | 0 | 0 |
| 215 | 47 | 2 | 2 | 24.33 | 2 | 1 | 1 | 3 | 1 | 0 | 1 | 0 | 0 |
| 216 | 71 | 1 | 2 | 15.63 | 1 | 1 | 1 | 1 | 0 | 0 | 0 | 0 | 0 |
| 217 | 24 | 2 | 2 | 20.50 | 2 | 1 | 2 | 0 | 0 | 0 | 0 | 0 | 0 |
| 218 | 37 | 2 | 1 | 12.47 | 1 | 1 | 2 | 0 | 0 | 0 | 0 | 0 | 0 |
| 219 | 24 | 2 | 2 | 18.65 | 1 | 1 | 2 | 0 | 0 | 0 | 0 | 0 | 0 |
| 220 | 44 | 2 | 2 | 17.40 | 1 | 1 | 2 | 0 | 0 | 0 | 0 | 0 | 0 |
| 221 | 94 | 1 | 1 | 18.30 | 1 | 1 | 2 | 3 | 1 | 0 | 1 | 0 | 0 |
| 222 | 64 | 1 | 2 | 25.01 | 2 | 1 | 1 | 4 | 1 | 0 | 1 | 1 | 0 |
| 223 | 51 | 2 | 1 | 26.21 | 2 | 1 | 2 | 3 | 1 | 0 | 1 | 0 | 0 |
| 224 | 21 | 2 | 1 | 36.79 | 2 | 1 | 2 | 1 | 0 | 0 | 0 | 0 | 0 |
| 225 | 49 | 2 | 1 | 30.32 | 2 | 1 | 1 | 2 | 0 | 1 | 0 | 0 | 0 |
| 226 | 27 | 2 | 2 | 14.19 | 1 | 1 | 1 | 1 | 0 | 0 | 0 | 0 | 0 |

|     |    |   |   |       |   |   |   |   |   |   |   |   |   |
|-----|----|---|---|-------|---|---|---|---|---|---|---|---|---|
| 227 | 67 | 1 | 1 | 17.52 | 1 | 1 | 1 | 2 | 0 | 0 | 0 | 0 | 0 |
| 228 | 57 | 2 | 1 | 18.32 | 1 | 1 | 2 | 4 | 1 | 0 | 1 | 1 | 1 |
| 229 | 74 | 1 | 1 | 17.47 | 1 | 1 | 2 | 0 | 0 | 1 | 0 | 0 | 0 |
| 230 | 48 | 2 | 1 | 17.57 | 1 | 1 | 1 | 3 | 1 | 0 | 0 | 0 | 0 |
| 231 | 50 | 2 | 2 | 25.79 | 2 | 1 | 2 | 0 | 0 | 0 | 0 | 0 | 0 |
| 232 | 31 | 2 | 2 | 19.43 | 1 | 2 | 2 | 1 | 0 | 0 | 0 | 0 | 0 |
| 233 | 26 | 2 | 2 | 13.93 | 1 | 1 | 2 | 1 | 0 | 0 | 0 | 0 | 0 |
| 234 | 47 | 2 | 1 | 23.71 | 2 | 1 | 1 | 3 | 1 | 0 | 1 | 0 | 1 |
| 235 | 45 | 2 | 2 | 23.66 | 2 | 1 | 1 | 2 | 0 | 1 | 0 | 0 | 0 |
| 236 | 27 | 2 | 2 | 16.49 | 1 | 2 | 1 | 1 | 0 | 0 | 0 | 0 | 0 |
| 237 | 66 | 1 | 1 | 29.95 | 2 | 1 | 1 | 4 | 1 | 0 | 1 | 1 | 1 |
| 238 | 45 | 2 | 2 | 33.36 | 2 | 1 | 2 | 0 | 0 | 0 | 0 | 0 | 0 |
| 239 | 63 | 1 | 1 | 27.7  | 2 | 1 | 2 | 3 | 1 | 0 | 1 | 0 | 0 |
| 240 | 63 | 1 | 1 | 18.44 | 1 | 1 | 2 | 2 | 0 | 0 | 0 | 0 | 0 |
| 241 | 50 | 2 | 2 | 22.63 | 2 | 1 | 1 | 2 | 0 | 0 | 0 | 0 | 0 |
| 242 | 52 | 2 | 1 | 16.38 | 1 | 1 | 1 | 2 | 0 | 0 | 0 | 0 | 0 |
| 243 | 65 | 1 | 1 | 13.97 | 1 | 2 | 1 | 2 | 0 | 0 | 0 | 0 | 0 |
| 244 | 59 | 2 | 1 | 19.29 | 1 | 1 | 2 | 3 | 1 | 0 | 1 | 0 | 0 |
| 245 | 66 | 1 | 2 | 23.73 | 2 | 1 | 1 | 2 | 0 | 1 | 0 | 0 | 0 |
| 246 | 23 | 2 | 2 | 22.67 | 2 | 1 | 2 | 0 | 0 | 0 | 0 | 0 | 0 |
| 247 | 71 | 1 | 1 | 28.46 | 2 | 1 | 1 | 2 | 0 | 0 | 0 | 0 | 0 |
| 248 | 47 | 2 | 1 | 27.27 | 2 | 1 | 2 | 3 | 1 | 1 | 1 | 0 | 0 |
| 249 | 21 | 2 | 2 | 29.90 | 2 | 1 | 1 | 2 | 0 | 0 | 0 | 0 | 0 |
| 250 | 55 | 2 | 1 | 16.70 | 1 | 1 | 2 | 3 | 1 | 0 | 0 | 0 | 0 |
| 251 | 64 | 1 | 1 | 30.1  | 2 | 1 | 2 | 0 | 0 | 1 | 0 | 0 | 0 |
| 252 | 74 | 1 | 2 | 18.07 | 1 | 1 | 2 | 2 | 0 | 0 | 0 | 0 | 0 |
| 253 | 68 | 1 | 1 | 10.93 | 1 | 1 | 2 | 4 | 1 | 0 | 1 | 1 | 0 |
| 254 | 72 | 1 | 1 | 31.32 | 2 | 1 | 1 | 4 | 1 | 0 | 1 | 1 | 0 |
| 255 | 51 | 2 | 2 | 13.62 | 1 | 1 | 2 | 3 | 1 | 0 | 0 | 0 | 1 |
| 256 | 60 | 2 | 2 | 21.24 | 2 | 1 | 1 | 4 | 1 | 0 | 1 | 1 | 0 |
| 257 | 69 | 1 | 2 | 30.05 | 2 | 1 | 1 | 2 | 0 | 0 | 0 | 0 | 0 |
| 258 | 38 | 2 | 1 | 26.25 | 2 | 1 | 2 | 3 | 1 | 0 | 1 | 0 | 0 |
| 259 | 56 | 2 | 2 | 28.74 | 2 | 1 | 1 | 2 | 0 | 0 | 0 | 0 | 0 |
| 260 | 29 | 2 | 1 | 14.40 | 1 | 2 | 2 | 1 | 0 | 0 | 0 | 0 | 0 |
| 261 | 28 | 2 | 1 | 26.63 | 2 | 1 | 2 | 2 | 0 | 0 | 0 | 0 | 0 |
| 262 | 66 | 1 | 1 | 25.05 | 2 | 1 | 1 | 2 | 0 | 0 | 0 | 0 | 0 |
| 263 | 31 | 2 | 1 | 15.11 | 1 | 1 | 2 | 1 | 0 | 0 | 0 | 0 | 0 |
| 264 | 77 | 1 | 1 | 25.40 | 2 | 1 | 1 | 2 | 0 | 0 | 0 | 0 | 0 |
| 265 | 36 | 2 | 2 | 25.40 | 2 | 1 | 2 | 4 | 1 | 1 | 1 | 1 | 0 |
| 266 | 61 | 1 | 1 | 23.16 | 2 | 1 | 2 | 4 | 1 | 0 | 1 | 1 | 1 |
| 267 | 0  | 2 | 1 | 18.69 | 1 | 1 | 2 | 2 | 0 | 0 | 0 | 0 | 0 |
| 268 | 77 | 1 | 1 | 28.01 | 2 | 1 | 1 | 2 | 0 | 0 | 0 | 0 | 0 |
| 269 | 87 | 1 | 2 | 26.60 | 2 | 1 | 1 | 3 | 1 | 0 | 0 | 0 | 0 |
| 270 | 36 | 2 | 2 | 18.89 | 1 | 1 | 2 | 1 | 0 | 0 | 0 | 0 | 0 |
| 271 | 65 | 1 | 1 | 31.97 | 2 | 1 | 1 | 3 | 1 | 0 | 0 | 0 | 0 |
| 272 | 54 | 2 | 1 | 19.20 | 1 | 2 | 1 | 4 | 1 | 0 | 1 | 1 | 0 |
| 273 | 50 | 2 | 1 | 29.58 | 2 | 1 | 1 | 2 | 0 | 0 | 0 | 0 | 0 |
| 274 | 63 | 1 | 2 | 15.14 | 1 | 2 | 1 | 2 | 0 | 0 | 0 | 0 | 0 |
| 275 | 48 | 2 | 1 | 24.01 | 2 | 1 | 2 | 3 | 1 | 1 | 0 | 0 | 0 |
| 276 | 63 | 1 | 1 | 15.80 | 1 | 1 | 1 | 3 | 1 | 1 | 1 | 0 | 0 |
| 277 | 67 | 1 | 1 | 31.06 | 2 | 1 | 1 | 2 | 0 | 1 | 0 | 0 | 0 |
| 278 | 27 | 2 | 2 | 31.24 | 2 | 1 | 2 | 4 | 1 | 0 | 1 | 1 | 0 |
| 279 | 55 | 2 | 1 | 25.56 | 2 | 1 | 1 | 4 | 1 | 0 | 1 | 1 | 1 |
| 280 | 60 | 2 | 2 | 30.51 | 2 | 1 | 1 | 2 | 0 | 1 | 0 | 0 | 0 |
| 281 | 46 | 2 | 2 | 22.32 | 2 | 1 | 1 | 4 | 1 | 0 | 1 | 1 | 1 |
| 282 | 70 | 1 | 1 | 26.22 | 2 | 1 | 1 | 3 | 1 | 0 | 0 | 0 | 1 |
| 283 | 34 | 2 | 1 | 14.73 | 1 | 2 | 1 | 2 | 0 | 0 | 0 | 0 | 0 |
| 284 | 34 | 2 | 2 | 14.73 | 1 | 1 | 2 | 3 | 1 | 0 | 1 | 0 | 0 |
| 285 | 71 | 1 | 1 | 32.25 | 2 | 2 | 1 | 2 | 0 | 0 | 0 | 0 | 0 |

|     |    |   |   |       |   |   |   |   |   |   |   |   |   |
|-----|----|---|---|-------|---|---|---|---|---|---|---|---|---|
| 286 | 59 | 2 | 2 | 33.59 | 2 | 1 | 1 | 3 | 1 | 0 | 1 | 0 | 0 |
| 287 | 24 | 2 | 2 | 20.50 | 2 | 1 | 2 | 1 | 0 | 1 | 0 | 0 | 0 |
| 288 | 22 | 2 | 2 | 17.33 | 1 | 2 | 2 | 2 | 0 | 0 | 0 | 0 | 0 |
| 289 | 67 | 1 | 1 | 27.87 | 2 | 1 | 1 | 3 | 1 | 1 | 0 | 0 | 0 |
| 290 | 69 | 1 | 2 | 27.50 | 2 | 1 | 1 | 4 | 1 | 0 | 1 | 1 | 0 |
| 291 | 71 | 1 | 2 | 27.87 | 2 | 1 | 1 | 3 | 1 | 0 | 0 | 0 | 0 |
| 292 | 32 | 2 | 1 | 16.38 | 1 | 2 | 2 | 2 | 0 | 0 | 0 | 0 | 0 |
| 293 | 79 | 1 | 1 | 24.16 | 2 | 1 | 1 | 3 | 1 | 0 | 0 | 0 | 1 |
| 294 | 56 | 2 | 1 | 30.55 | 2 | 1 | 1 | 3 | 1 | 0 | 0 | 0 | 0 |
| 295 | 63 | 1 | 2 | 16.56 | 1 | 1 | 1 | 4 | 1 | 0 | 1 | 1 | 0 |
| 296 | 28 | 2 | 2 | 28.91 | 2 | 1 | 2 | 1 | 0 | 0 | 0 | 0 | 0 |
| 297 | 27 | 2 | 2 | 34.16 | 2 | 1 | 2 | 1 | 0 | 0 | 0 | 0 | 0 |
| 298 | 68 | 1 | 2 | 19.56 | 1 | 1 | 1 | 2 | 0 | 1 | 0 | 0 | 0 |
| 299 | 46 | 2 | 1 | 25.76 | 2 | 1 | 1 | 2 | 0 | 0 | 0 | 0 | 1 |
| 300 | 35 | 2 | 2 | 28.71 | 2 | 1 | 2 | 1 | 0 | 0 | 0 | 0 | 0 |
| 301 | 57 | 2 | 1 | 24.09 | 2 | 1 | 1 | 4 | 1 | 0 | 1 | 1 | 1 |
| 302 | 21 | 2 | 2 | 18.77 | 1 | 1 | 1 | 2 | 0 | 0 | 0 | 0 | 0 |
| 303 | 64 | 1 | 1 | 23.40 | 2 | 1 | 1 | 2 | 0 | 1 | 0 | 0 | 0 |
| 304 | 31 | 2 | 2 | 27.07 | 2 | 1 | 1 | 3 | 1 | 0 | 0 | 0 | 0 |
| 305 | 48 | 2 | 1 | 25.22 | 2 | 1 | 1 | 4 | 1 | 0 | 1 | 1 | 1 |
| 306 | 64 | 1 | 2 | 22.08 | 2 | 1 | 1 | 2 | 0 | 1 | 0 | 0 | 0 |
| 307 | 31 | 2 | 2 | 22.65 | 2 | 1 | 2 | 1 | 0 | 0 | 0 | 0 | 0 |
| 308 | 62 | 1 | 1 | 20.43 | 2 | 1 | 1 | 3 | 1 | 0 | 0 | 0 | 0 |
| 309 | 29 | 2 | 2 | 23.45 | 2 | 1 | 1 | 2 | 0 | 0 | 0 | 0 | 0 |
| 310 | 41 | 2 | 2 | 33.20 | 2 | 1 | 1 | 3 | 1 | 0 | 0 | 0 | 0 |
| 311 | 51 | 2 | 2 | 29.50 | 2 | 1 | 1 | 1 | 0 | 1 | 0 | 0 | 0 |
| 312 | 57 | 2 | 2 | 23.66 | 2 | 1 | 1 | 2 | 0 | 1 | 0 | 0 | 0 |
| 313 | 73 | 1 | 1 | 19.56 | 1 | 1 | 2 | 2 | 0 | 0 | 0 | 0 | 0 |
| 314 | 68 | 1 | 2 | 25.03 | 2 | 2 | 1 | 0 | 0 | 0 | 0 | 0 | 0 |
| 315 | 62 | 1 | 1 | 27.10 | 2 | 1 | 1 | 3 | 1 | 1 | 0 | 0 | 0 |
| 316 | 55 | 2 | 2 | 27.33 | 2 | 1 | 1 | 2 | 0 | 0 | 0 | 0 | 0 |
| 317 | 33 | 2 | 2 | 26.98 | 2 | 1 | 1 | 3 | 1 | 0 | 0 | 0 | 0 |
| 318 | 30 | 2 | 2 | 12.76 | 1 | 2 | 2 | 1 | 0 | 0 | 0 | 0 | 0 |
| 319 | 60 | 2 | 2 | 23.21 | 2 | 1 | 1 | 3 | 1 | 0 | 0 | 0 | 1 |
| 320 | 67 | 1 | 2 | 24.96 | 2 | 1 | 1 | 3 | 1 | 0 | 1 | 0 | 0 |
| 321 | 44 | 2 | 2 | 33.07 | 2 | 2 | 2 | 3 | 1 | 0 | 0 | 0 | 0 |
| 322 | 48 | 2 | 1 | 28.30 | 2 | 1 | 1 | 0 | 0 | 1 | 0 | 0 | 0 |
| 323 | 23 | 2 | 2 | 12.95 | 1 | 1 | 2 | 2 | 0 | 0 | 0 | 0 | 0 |
| 324 | 43 | 2 | 2 | 24.92 | 2 | 1 | 1 | 2 | 0 | 0 | 0 | 0 | 0 |
| 325 | 54 | 2 | 2 | 30.11 | 2 | 1 | 1 | 4 | 1 | 0 | 1 | 1 | 1 |
| 326 | 48 | 2 | 2 | 27.02 | 2 | 1 | 1 | 2 | 0 | 0 | 0 | 0 | 0 |
| 327 | 23 | 2 | 2 | 20.61 | 2 | 2 | 2 | 2 | 0 | 0 | 0 | 0 | 0 |
| 328 | 65 | 1 | 1 | 32.14 | 2 | 1 | 2 | 3 | 1 | 1 | 0 | 0 | 0 |
| 329 | 66 | 1 | 2 | 29.44 | 2 | 1 | 1 | 3 | 1 | 0 | 0 | 0 | 0 |
| 330 | 34 | 2 | 2 | 22.75 | 2 | 1 | 1 | 2 | 0 | 0 | 0 | 0 | 0 |
| 331 | 28 | 2 | 2 | 18.21 | 1 | 1 | 2 | 1 | 0 | 0 | 0 | 0 | 0 |
| 332 | 55 | 2 | 2 | 29.56 | 2 | 1 | 2 | 0 | 0 | 0 | 0 | 0 | 0 |
| 333 | 64 | 1 | 1 | 28.14 | 2 | 2 | 2 | 0 | 0 | 0 | 0 | 0 | 0 |
| 334 | 33 | 2 | 2 | 19.40 | 1 | 1 | 2 | 0 | 0 | 0 | 0 | 0 | 0 |
| 335 | 32 | 2 | 2 | 9.80  | 1 | 1 | 2 | 1 | 0 | 0 | 0 | 0 | 0 |
| 336 | 60 | 2 | 2 | 17.09 | 1 | 1 | 1 | 2 | 0 | 1 | 0 | 0 | 0 |
| 337 | 61 | 1 | 1 | 26.92 | 2 | 2 | 1 | 1 | 0 | 0 | 0 | 0 | 0 |
| 338 | 24 | 2 | 2 | 21.46 | 2 | 1 | 2 | 1 | 0 | 0 | 0 | 0 | 0 |
| 339 | 84 | 1 | 1 | 19.51 | 1 | 1 | 1 | 3 | 1 | 0 | 0 | 0 | 1 |
| 340 | 63 | 1 | 1 | 17.38 | 1 | 2 | 2 | 0 | 0 | 0 | 0 | 0 | 0 |
| 341 | 67 | 1 | 1 | 28.03 | 2 | 1 | 1 | 3 | 1 | 1 | 0 | 0 | 0 |
| 342 | 70 | 1 | 1 | 27.28 | 2 | 1 | 1 | 1 | 0 | 0 | 0 | 0 | 0 |
| 343 | 49 | 2 | 2 | 18.00 | 1 | 1 | 2 | 2 | 0 | 0 | 0 | 0 | 0 |
| 344 | 51 | 2 | 1 | 24.39 | 2 | 1 | 1 | 2 | 0 | 1 | 0 | 0 | 0 |

|     |    |   |   |       |   |   |   |   |   |   |   |   |   |
|-----|----|---|---|-------|---|---|---|---|---|---|---|---|---|
| 345 | 61 | 1 | 2 | 27.45 | 2 | 1 | 1 | 3 | 1 | 0 | 0 | 0 | 0 |
| 346 | 35 | 2 | 1 | 23.94 | 2 | 1 | 1 | 4 | 1 | 0 | 1 | 1 | 0 |
| 347 | 55 | 2 | 2 | 29.99 | 2 | 1 | 1 | 2 | 0 | 0 | 0 | 0 | 0 |
| 348 | 38 | 2 | 2 | 16.21 | 1 | 1 | 2 | 0 | 0 | 0 | 0 | 0 | 0 |
| 349 | 64 | 1 | 2 | 18.92 | 1 | 1 | 1 | 2 | 0 | 0 | 0 | 0 | 0 |
| 350 | 20 | 2 | 2 | 32.13 | 2 | 1 | 2 | 1 | 0 | 0 | 0 | 0 | 0 |
| 351 | 32 | 2 | 2 | 16.28 | 1 | 2 | 2 | 2 | 0 | 1 | 0 | 0 | 0 |
| 352 | 48 | 2 | 2 | 29.75 | 2 | 1 | 1 | 3 | 1 | 0 | 0 | 0 | 0 |
| 353 | 44 | 2 | 2 | 32.47 | 2 | 1 | 1 | 3 | 1 | 0 | 0 | 0 | 1 |
| 354 | 45 | 2 | 1 | 24.10 | 2 | 1 | 1 | 3 | 1 | 0 | 0 | 0 | 1 |
| 355 | 57 | 2 | 1 | 24.12 | 2 | 1 | 1 | 4 | 1 | 0 | 1 | 1 | 1 |
| 356 | 35 | 2 | 1 | 29.99 | 2 | 1 | 1 | 2 | 0 | 0 | 0 | 0 | 0 |
| 357 | 35 | 2 | 2 | 13.12 | 1 | 1 | 2 | 0 | 0 | 0 | 0 | 0 | 0 |
| 358 | 27 | 2 | 2 | 23.38 | 2 | 1 | 2 | 2 | 0 | 0 | 0 | 0 | 0 |
| 359 | 48 | 2 | 1 | 20.05 | 2 | 1 | 1 | 3 | 1 | 0 | 0 | 0 | 1 |
| 360 | 50 | 2 | 2 | 15.46 | 1 | 2 | 2 | 2 | 0 | 1 | 0 | 0 | 0 |
| 361 | 63 | 1 | 2 | 18.79 | 1 | 1 | 1 | 2 | 0 | 0 | 0 | 0 | 0 |
| 362 | 70 | 1 | 2 | 15.25 | 1 | 1 | 1 | 2 | 0 | 0 | 0 | 0 | 0 |
| 363 | 80 | 1 | 1 | 31.52 | 2 | 1 | 1 | 4 | 1 | 0 | 1 | 1 | 1 |
| 364 | 32 | 2 | 2 | 16.31 | 1 | 1 | 1 | 0 | 0 | 0 | 0 | 0 | 0 |
| 365 | 36 | 2 | 2 | 34.36 | 2 | 2 | 2 | 2 | 0 | 0 | 0 | 0 | 0 |
| 366 | 61 | 1 | 2 | 23.64 | 2 | 1 | 1 | 3 | 1 | 0 | 0 | 0 | 0 |
| 367 | 60 | 2 | 1 | 30.49 | 2 | 1 | 2 | 2 | 0 | 0 | 0 | 0 | 0 |
| 368 | 29 | 2 | 1 | 11.23 | 1 | 2 | 1 | 2 | 0 | 1 | 0 | 0 | 0 |
| 369 | 64 | 1 | 1 | 19.16 | 1 | 2 | 1 | 0 | 0 | 0 | 0 | 0 | 0 |
| 370 | 35 | 2 | 2 | 18.80 | 1 | 1 | 1 | 1 | 0 | 0 | 0 | 0 | 0 |
| 371 | 38 | 2 | 1 | 13.50 | 1 | 2 | 1 | 2 | 0 | 0 | 0 | 0 | 0 |
| 372 | 74 | 1 | 2 | 19.05 | 1 | 1 | 2 | 2 | 0 | 1 | 0 | 0 | 0 |
| 373 | 34 | 2 | 1 | 18.53 | 1 | 2 | 2 | 2 | 0 | 0 | 0 | 0 | 0 |
